# Supplementary material for: The mitochondrial genome of the hexactinellid sponge Aphrocallistes vastus: Evidence for programmed translational frameshifting
Source: PubMed Central journal article supplement (PMC2267718; doi:10.1186/1471-2164-9-33), 2008-01-23

Alanine (A)

A

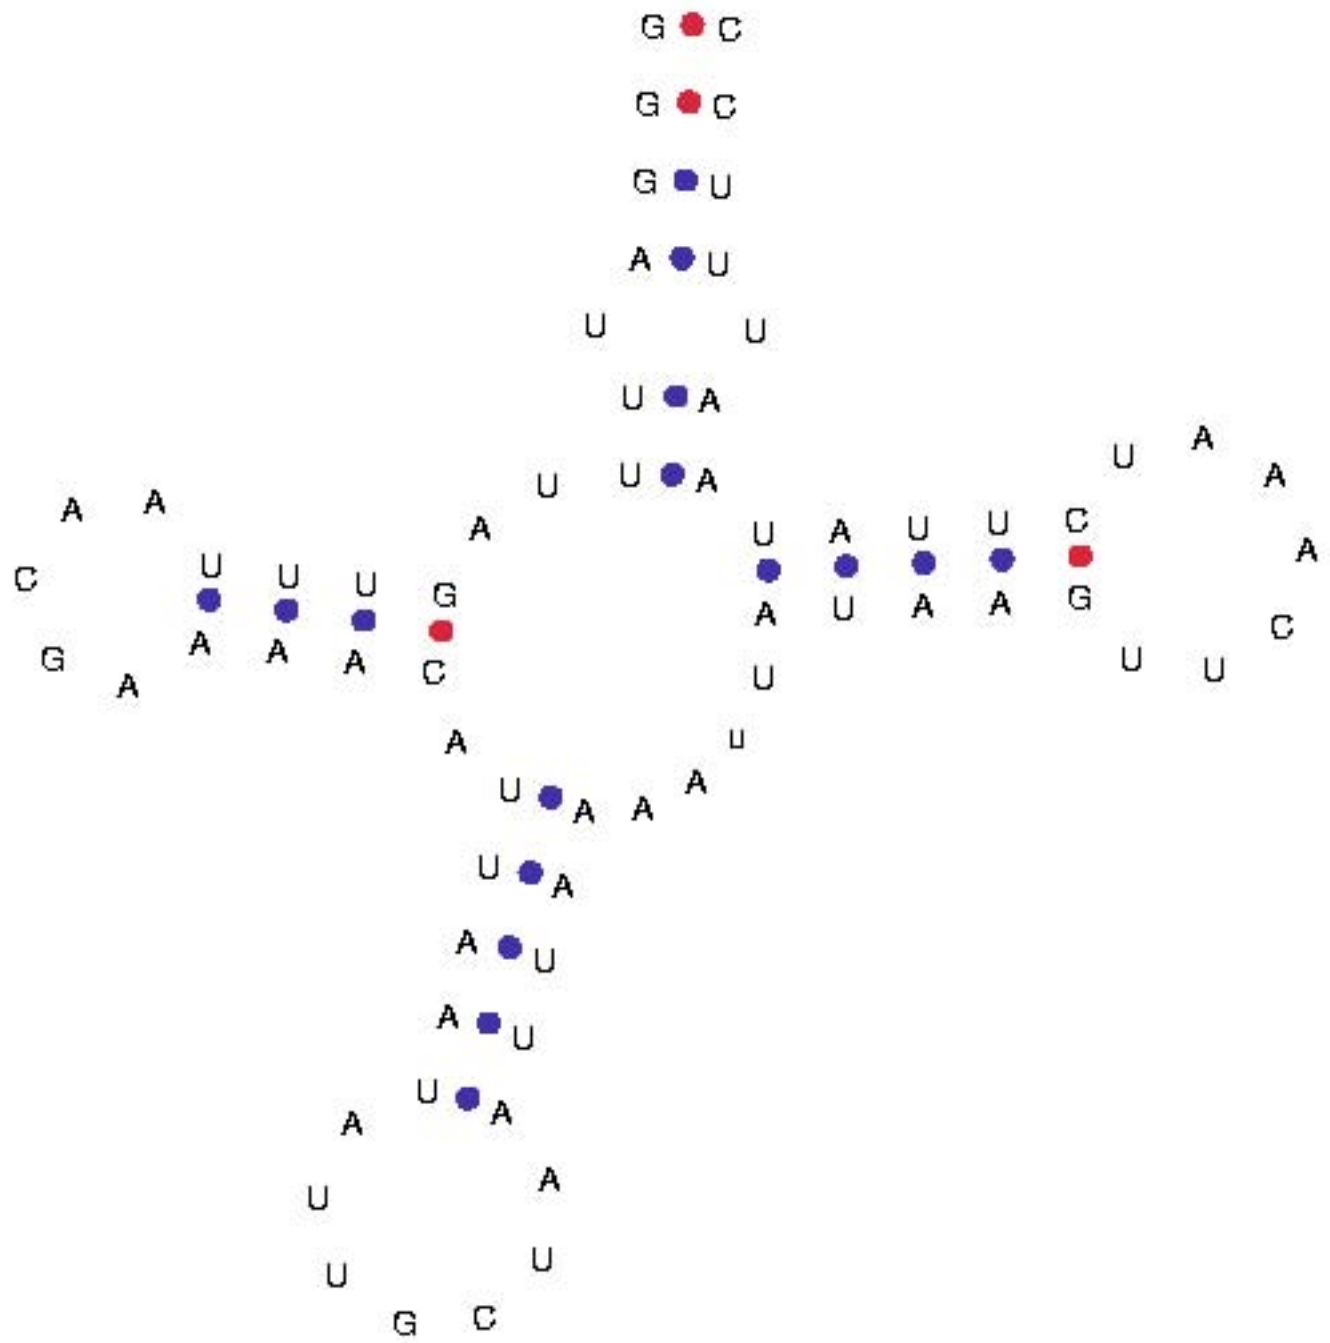





Cysteine (C)

U

A ● U

A ● U

C ● G

A ● U

A ● U

U ● A

A ● U

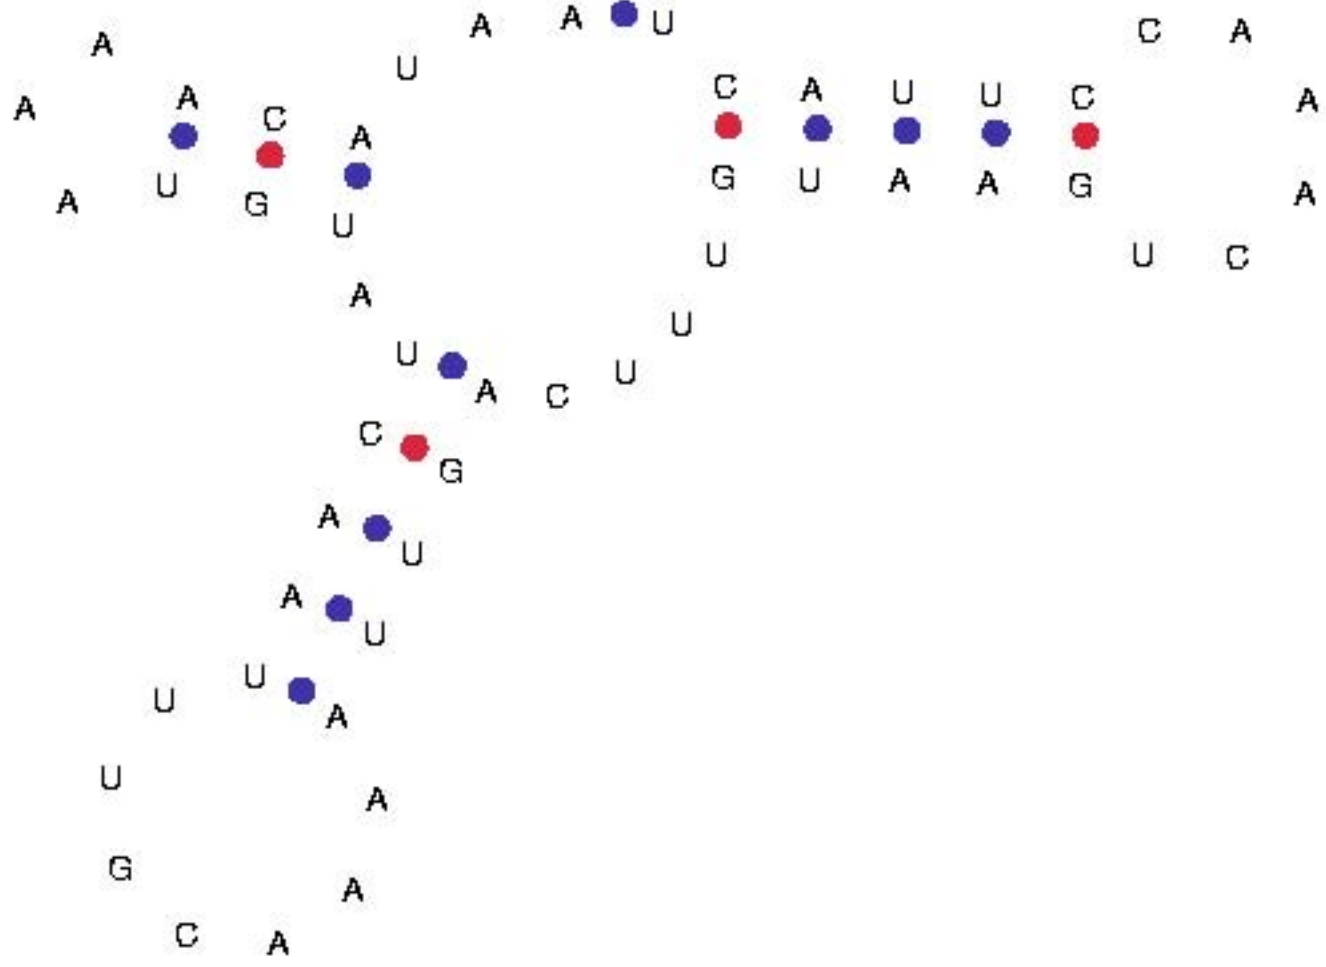

Glutamine (Q)

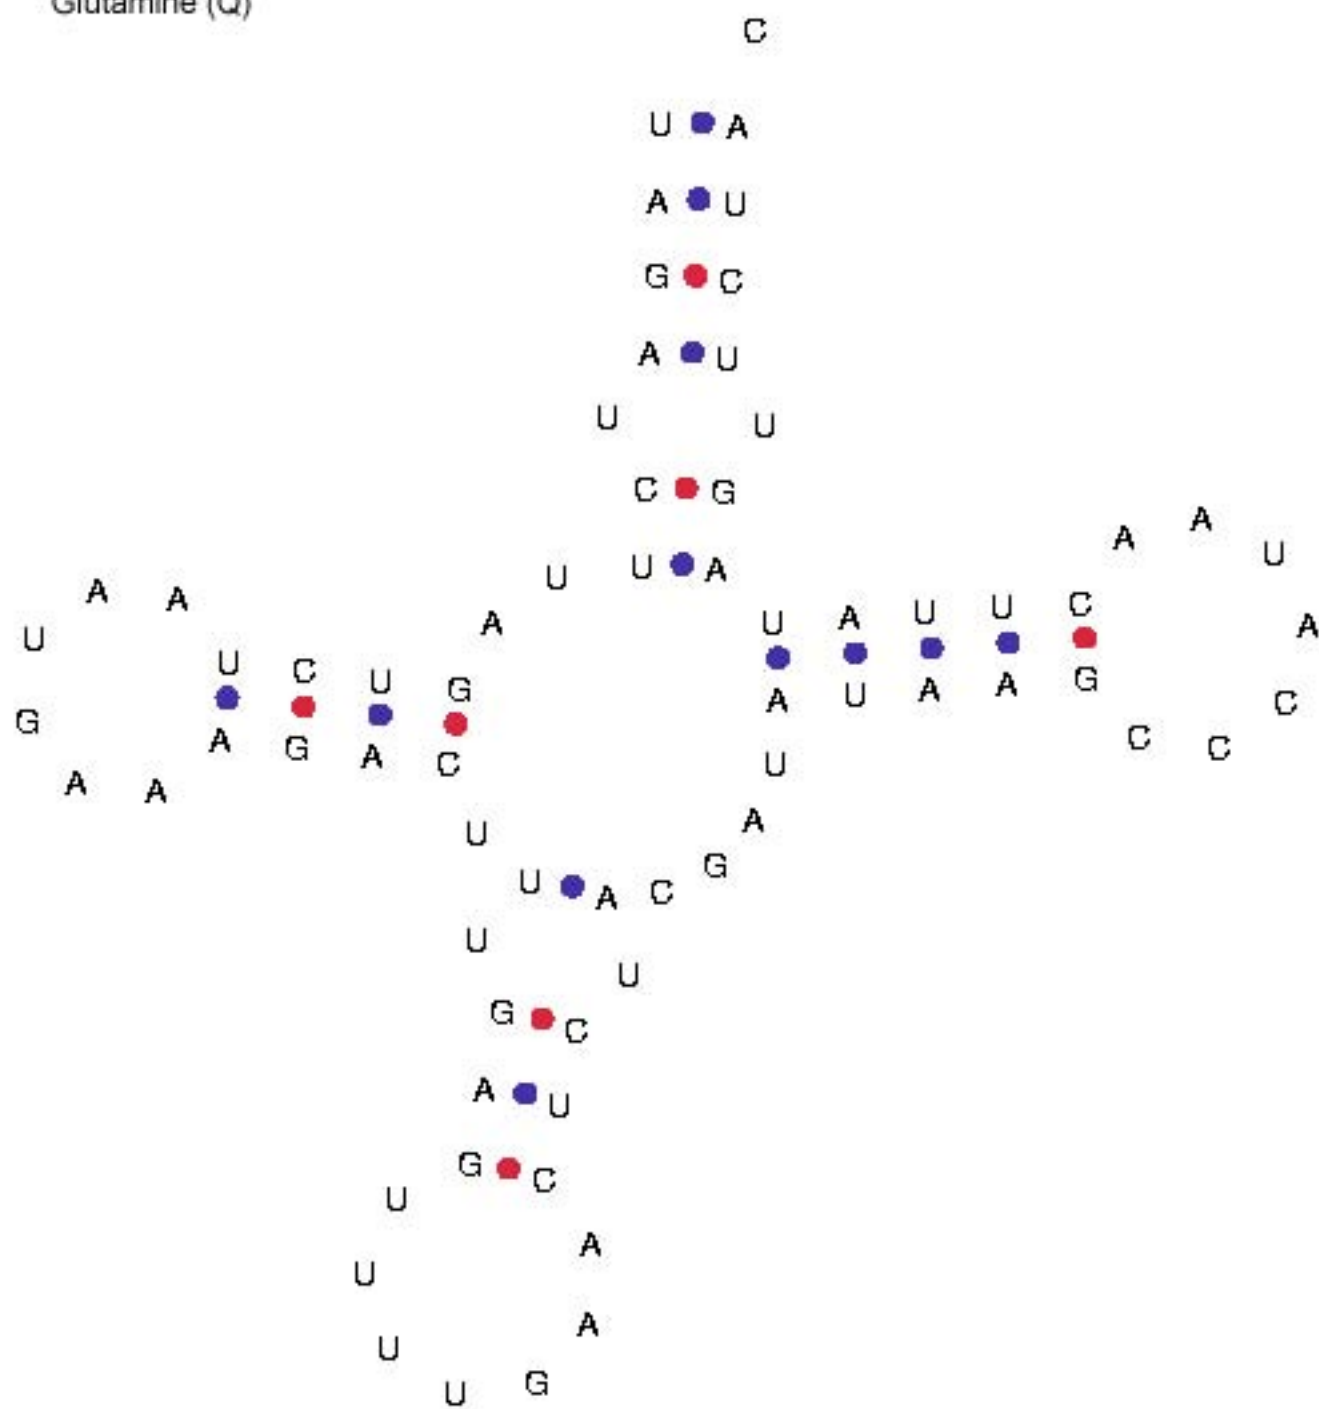

Glycine (G)

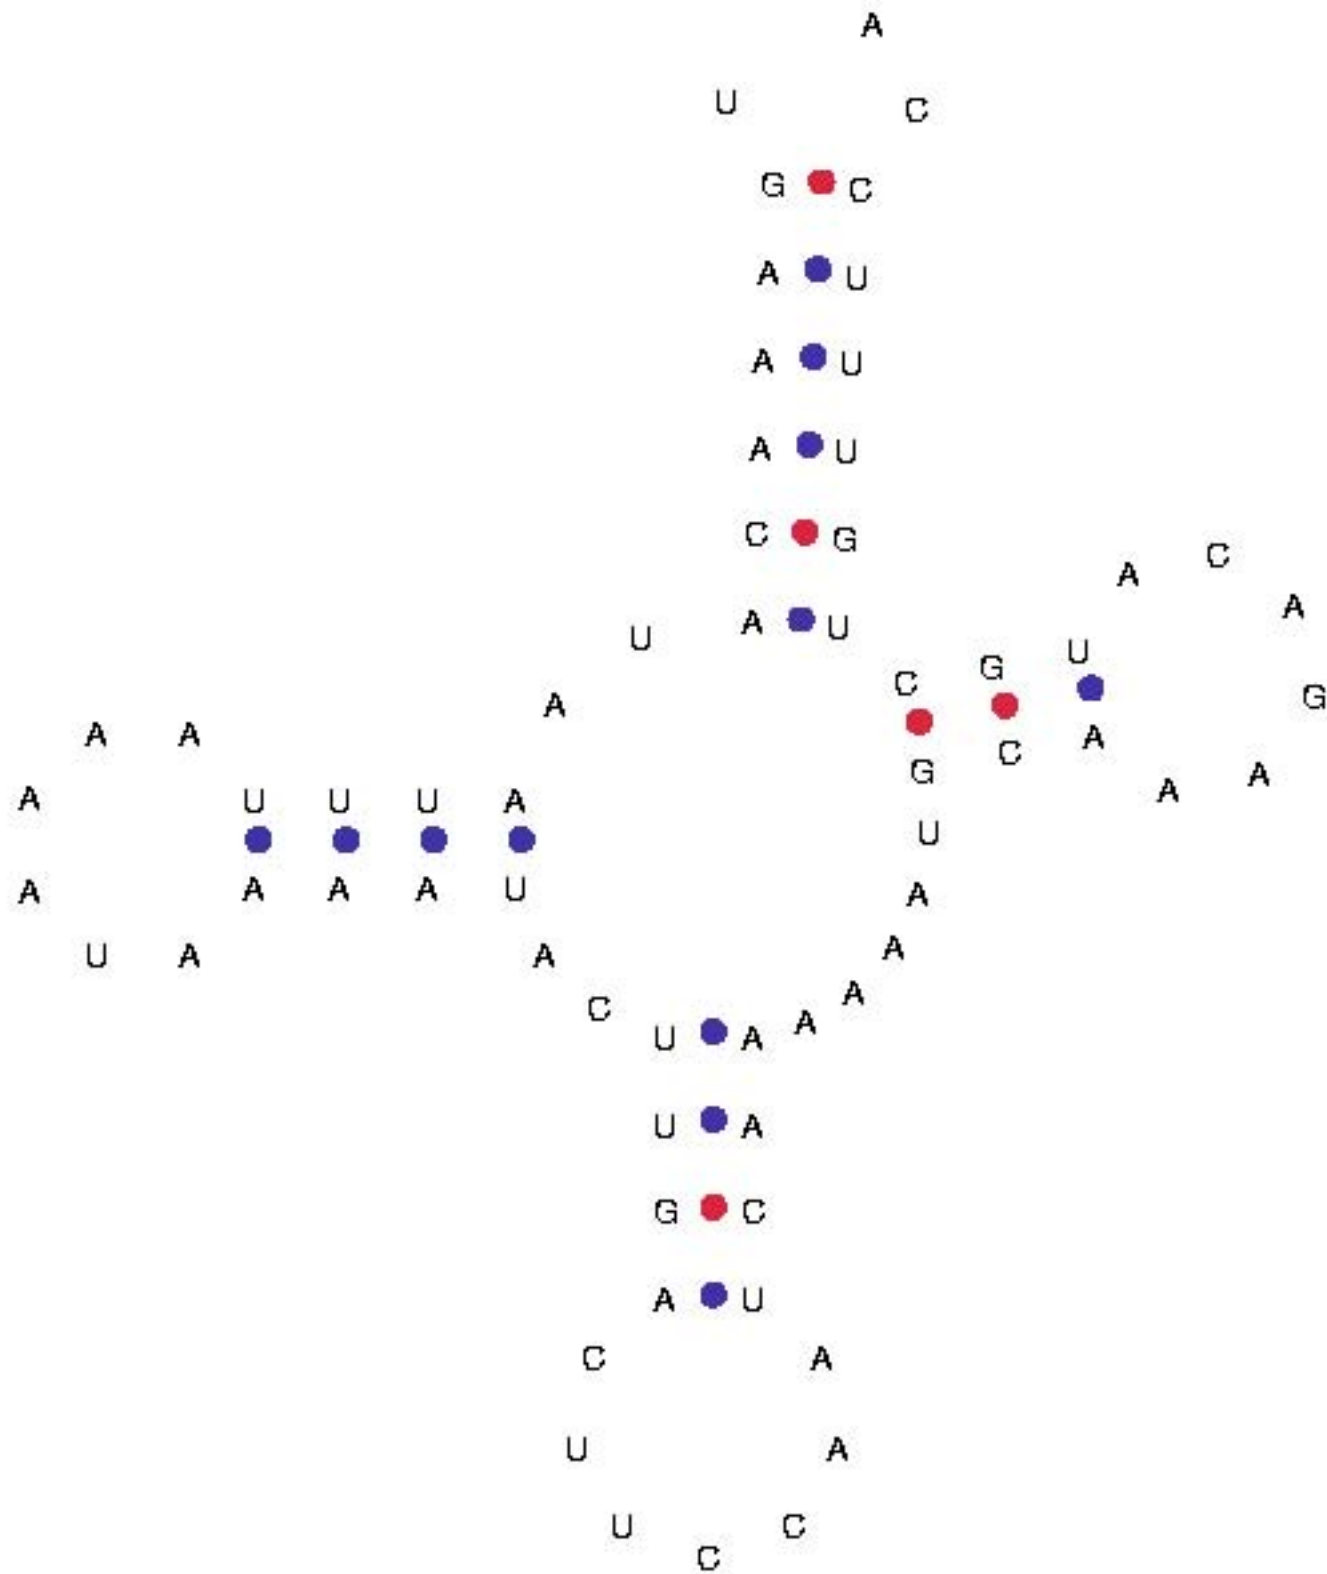







Leucine (L)

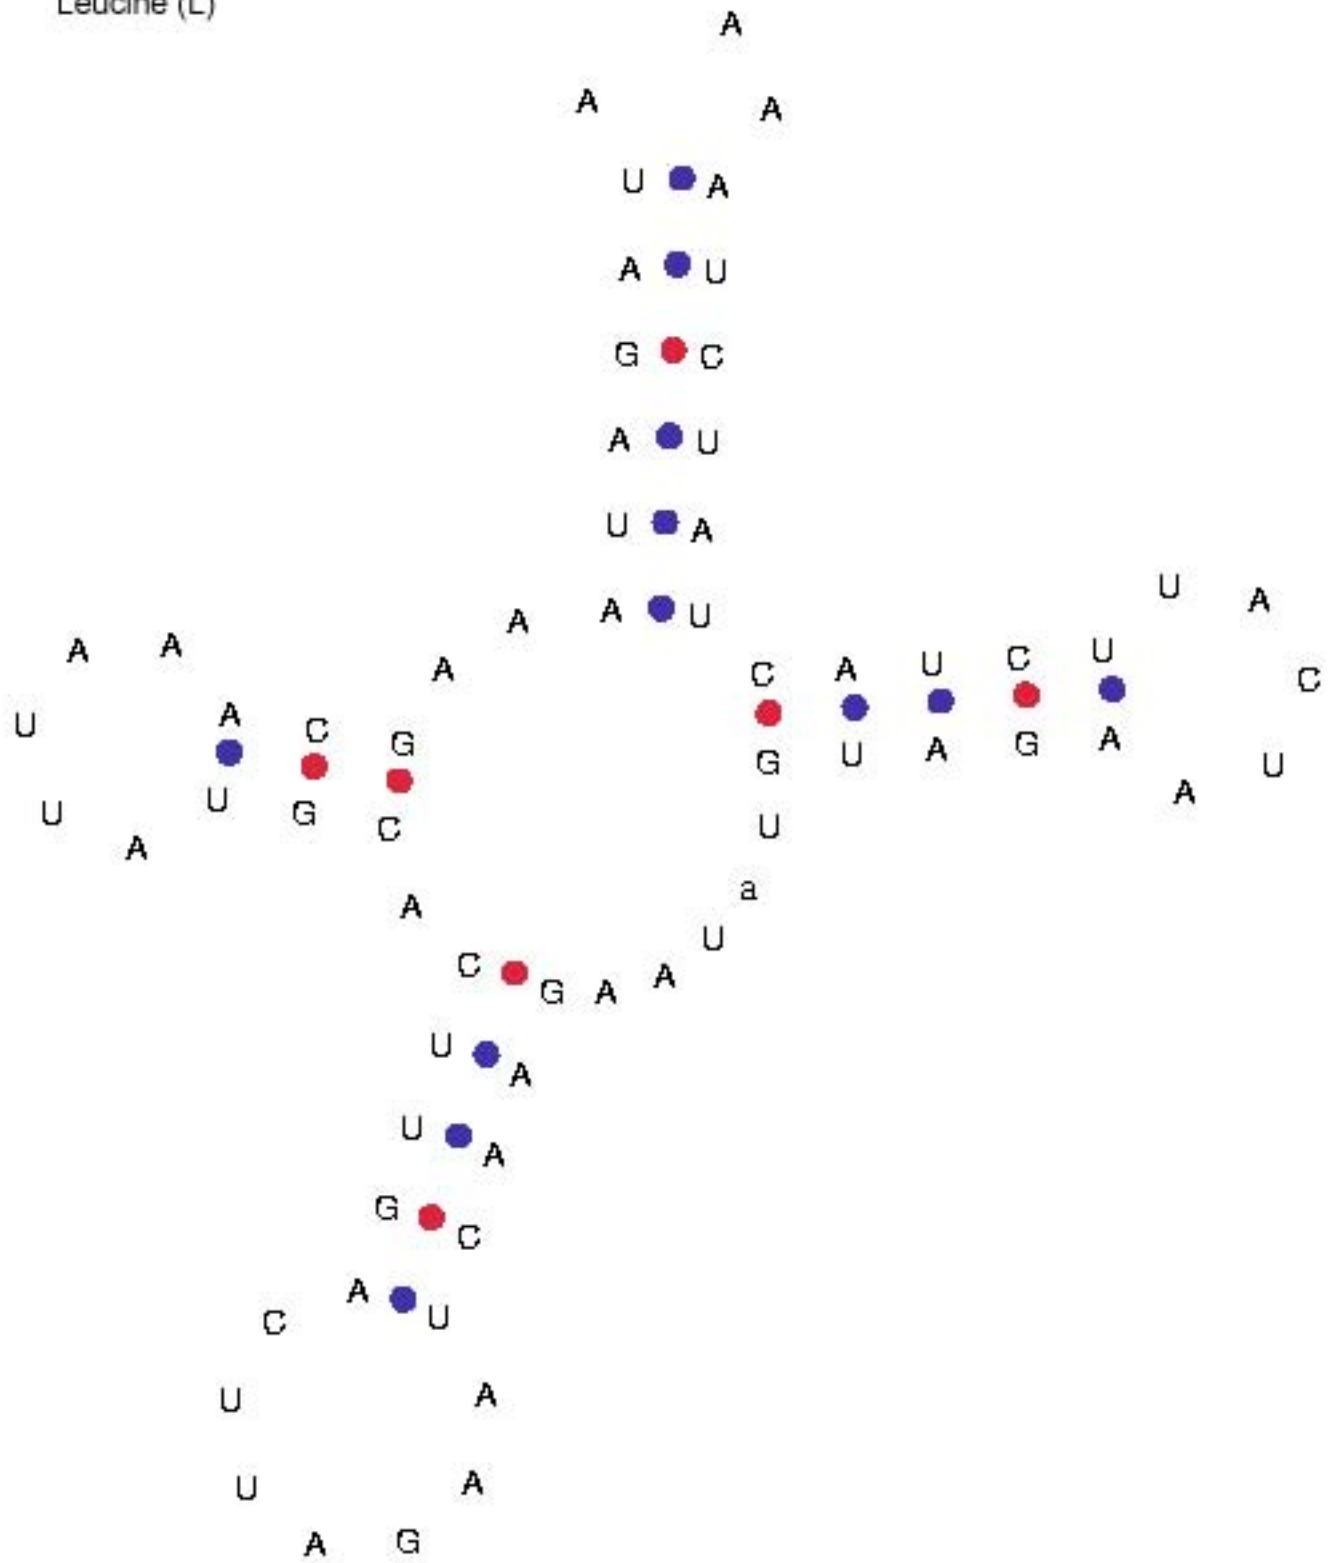

Lysine (K)

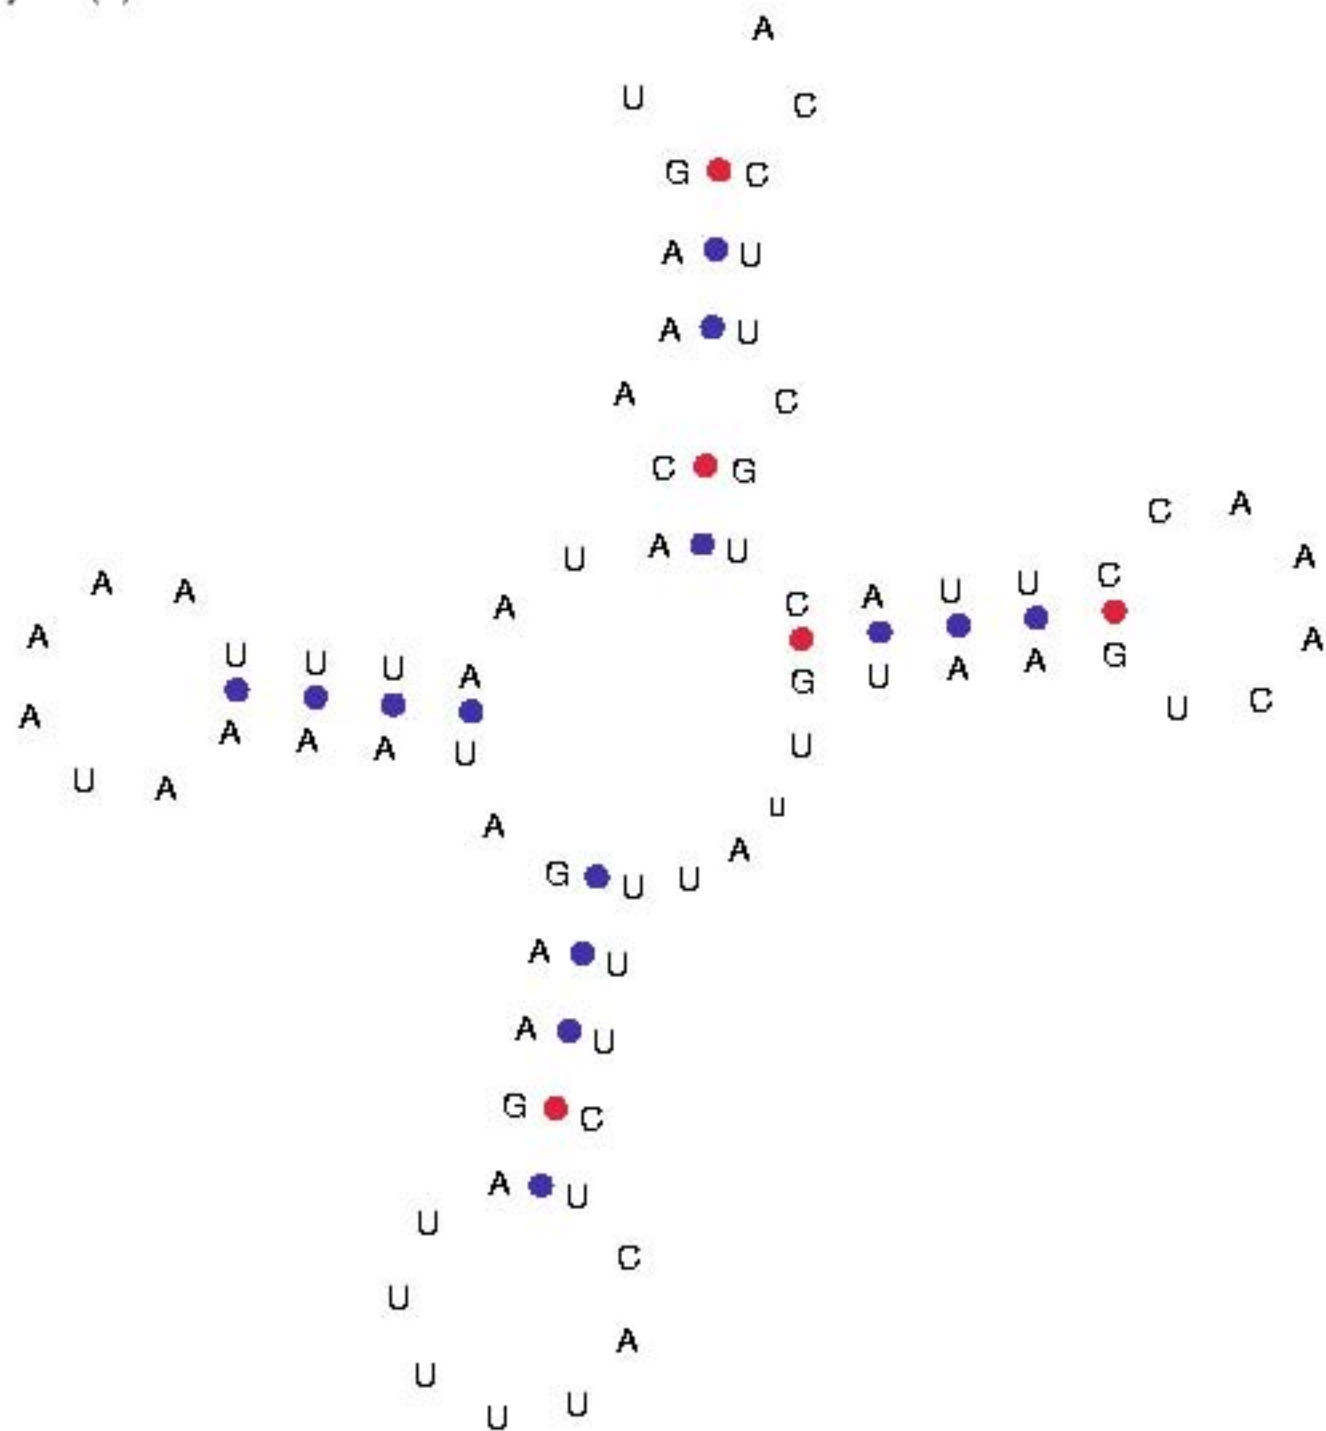

Methionine (M)

U

A ● U

C ● G

U ● A

U ● A

C ● G

U ● A

A ● U

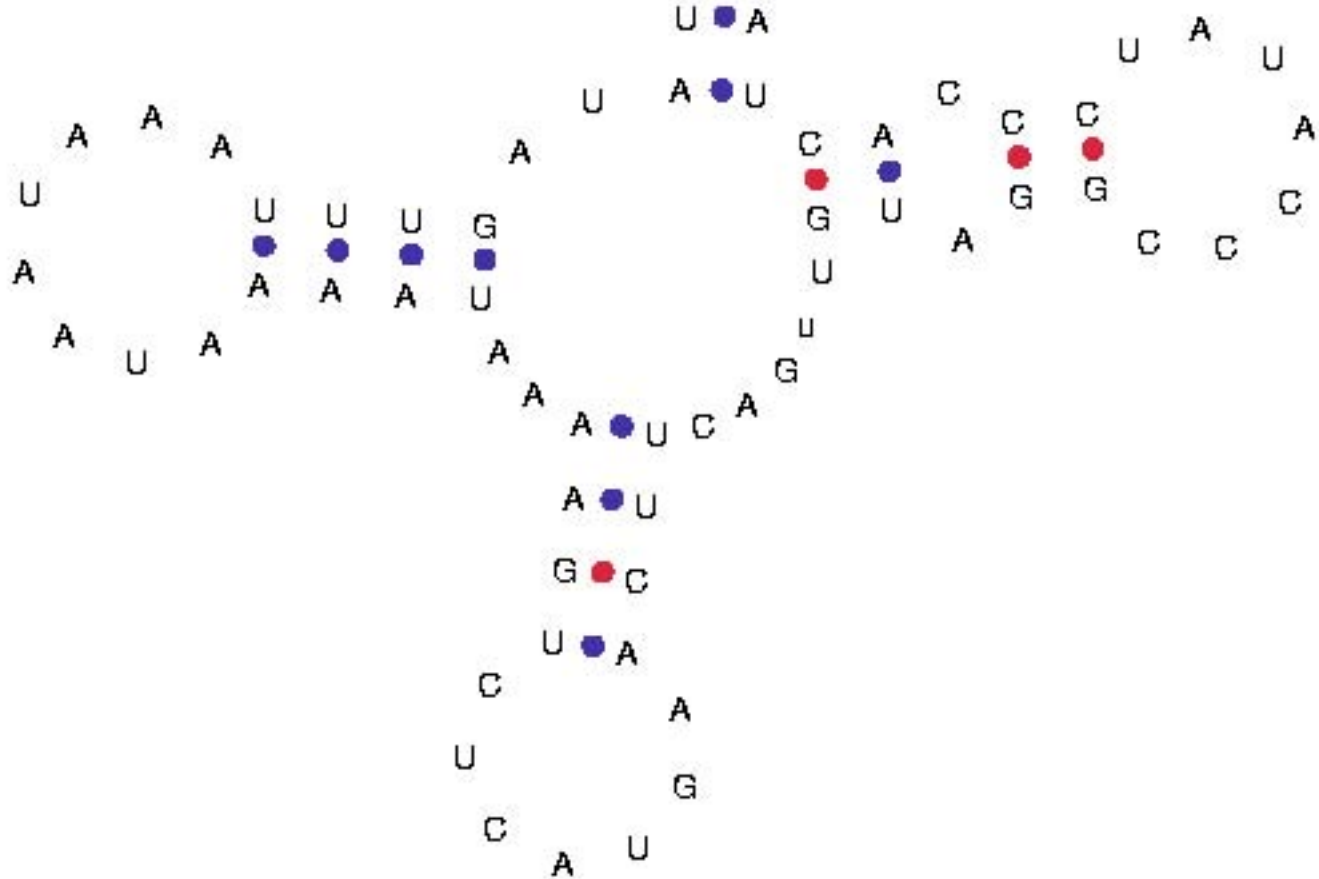



Proline (P)

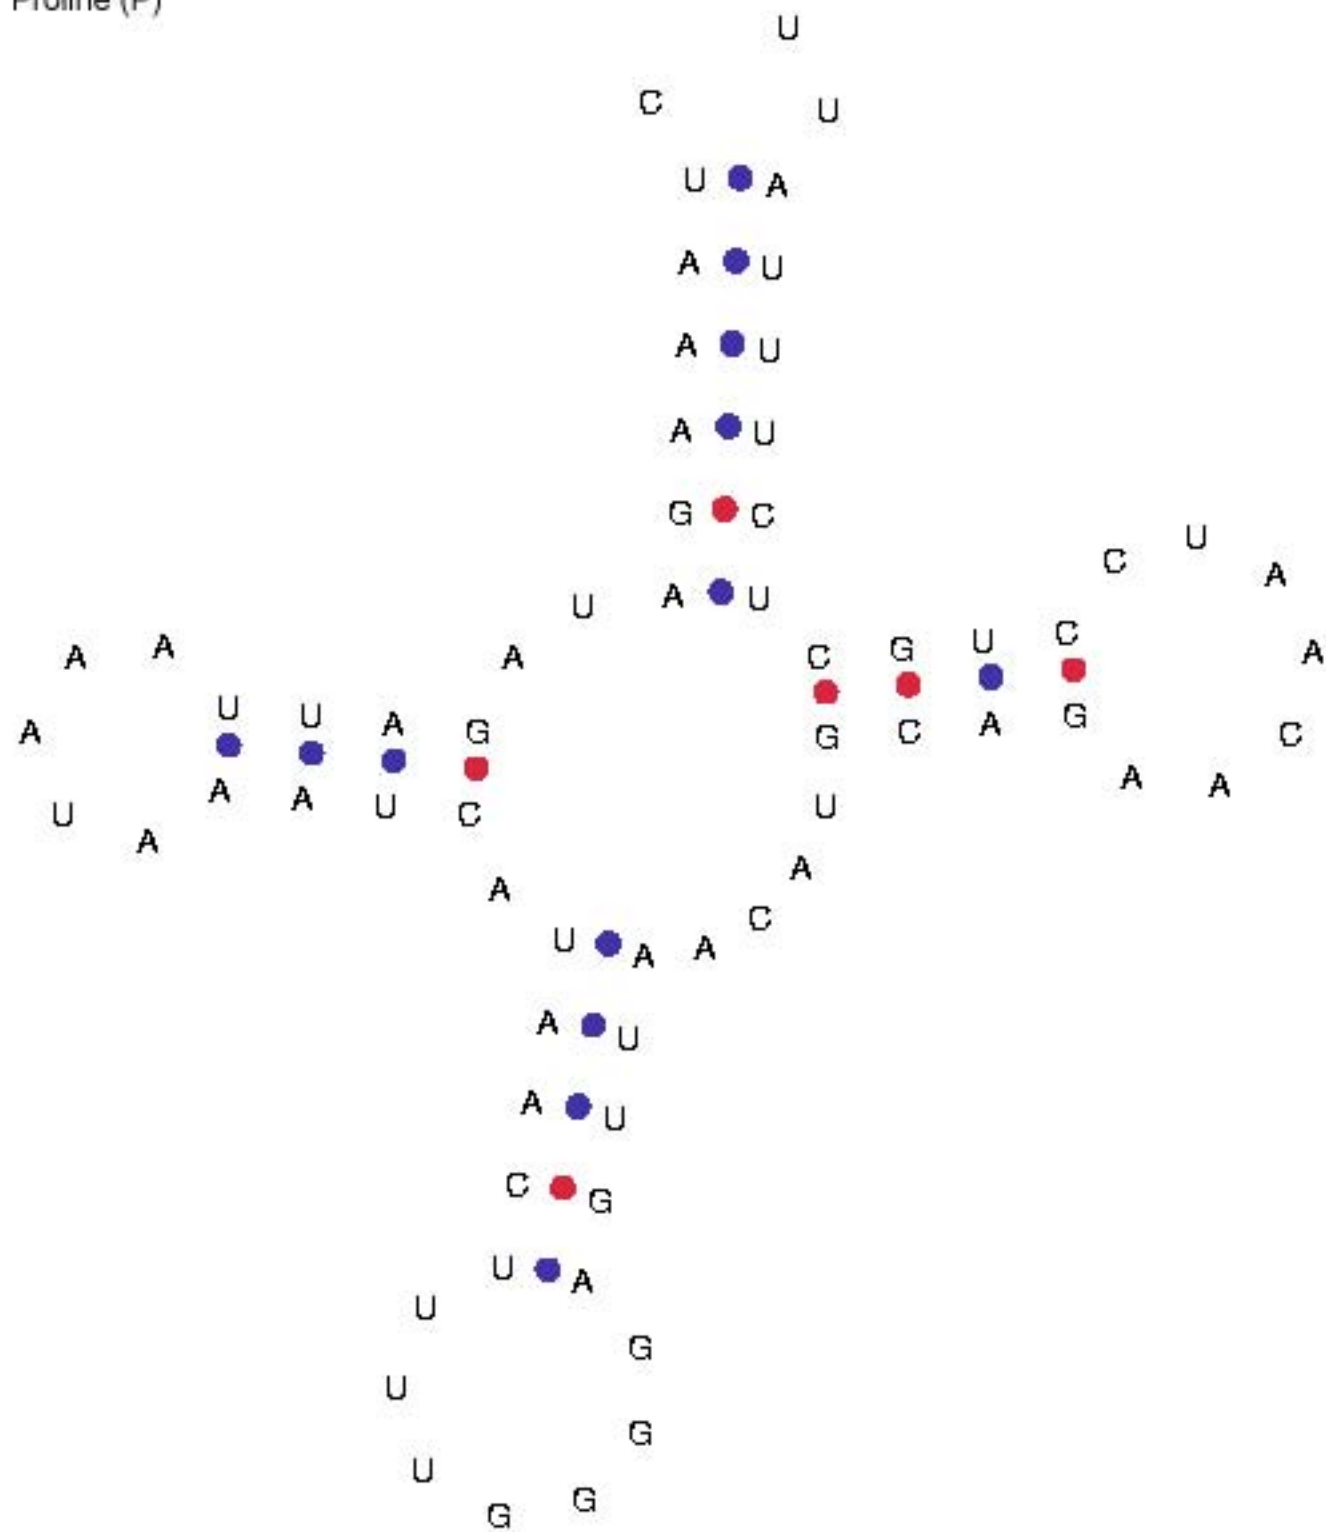



Serine (S2)  
(uga)

G

G ● C

A ● U

A ● U

A ● U

A ● U

A ● U

A ● U

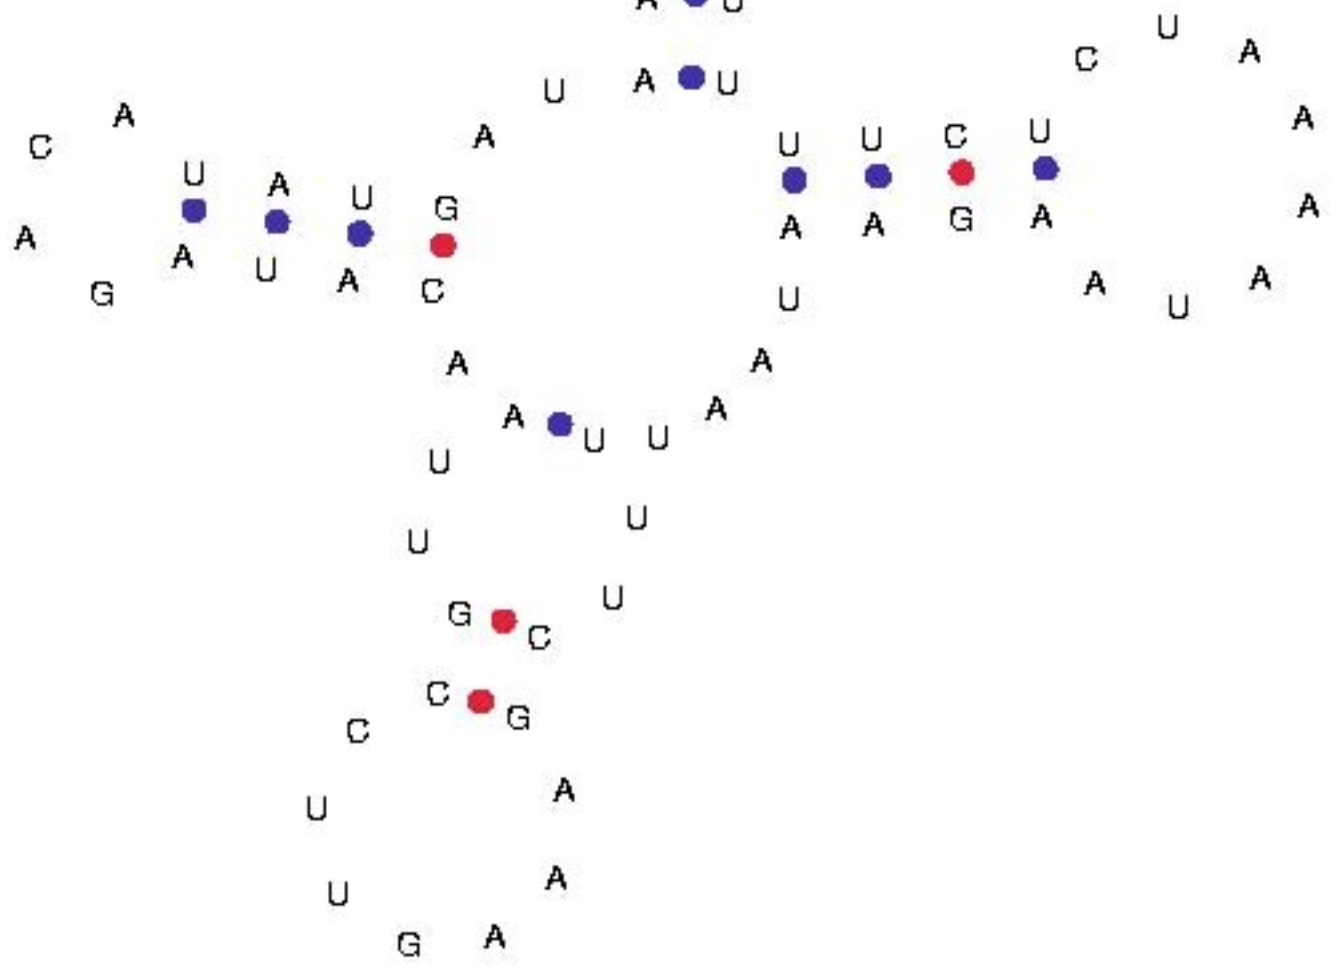

Tryptophan (W)

G

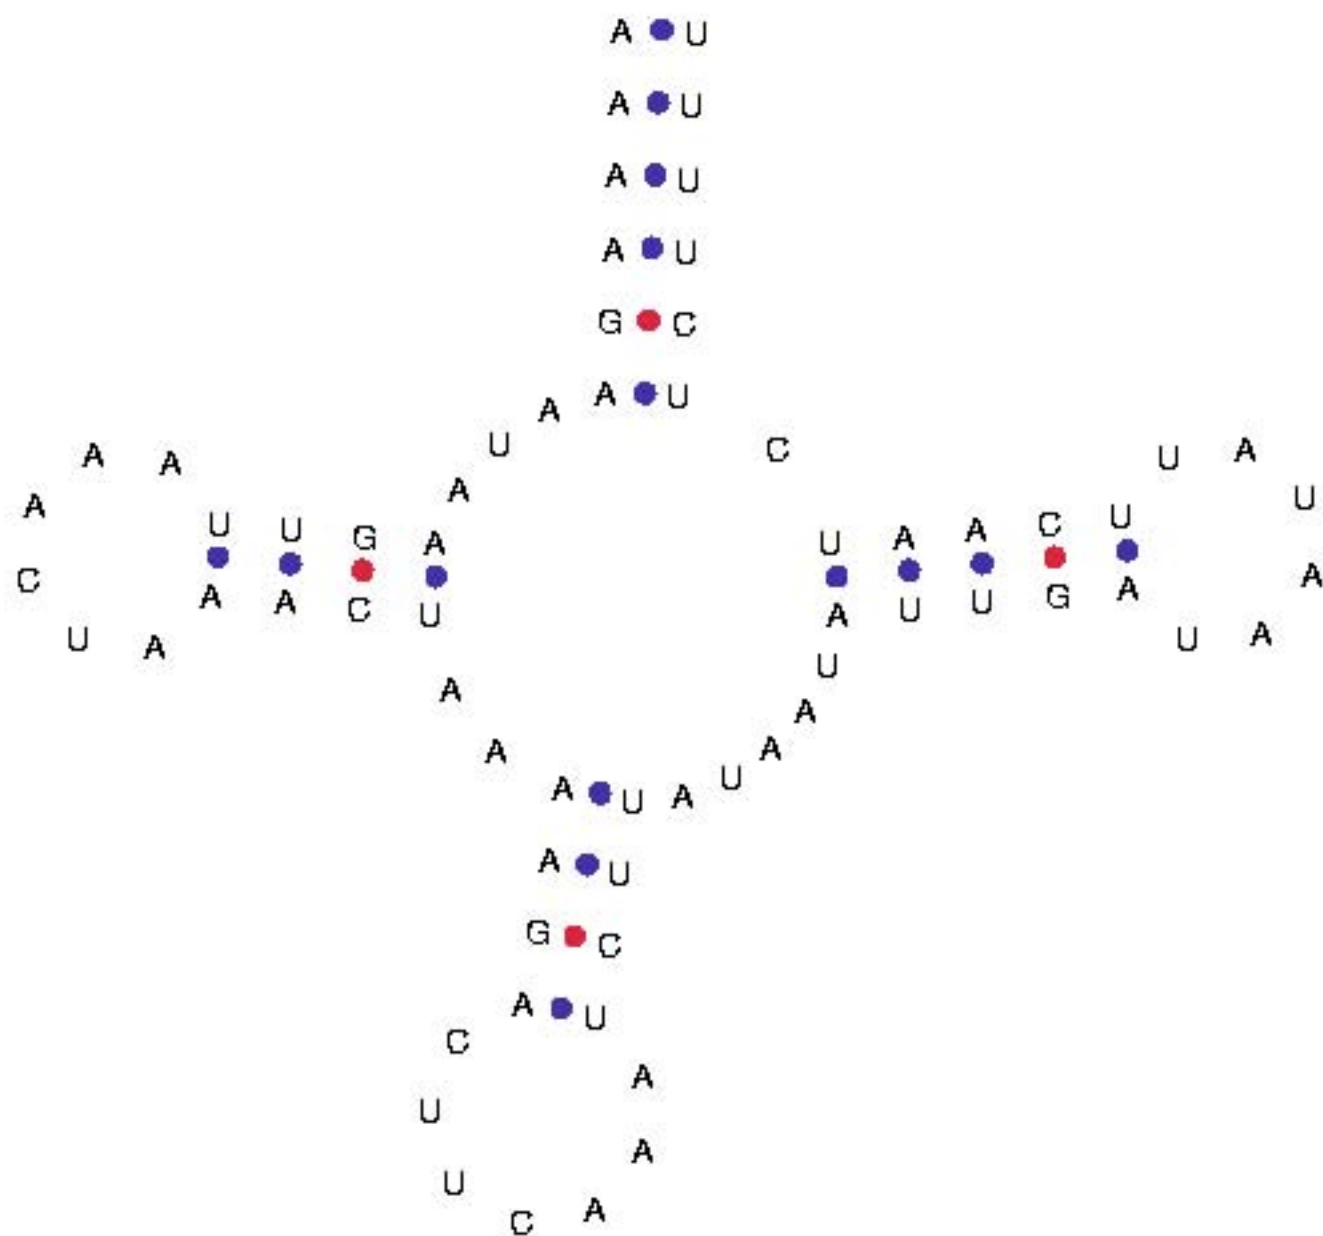



Tyrosine (Y)

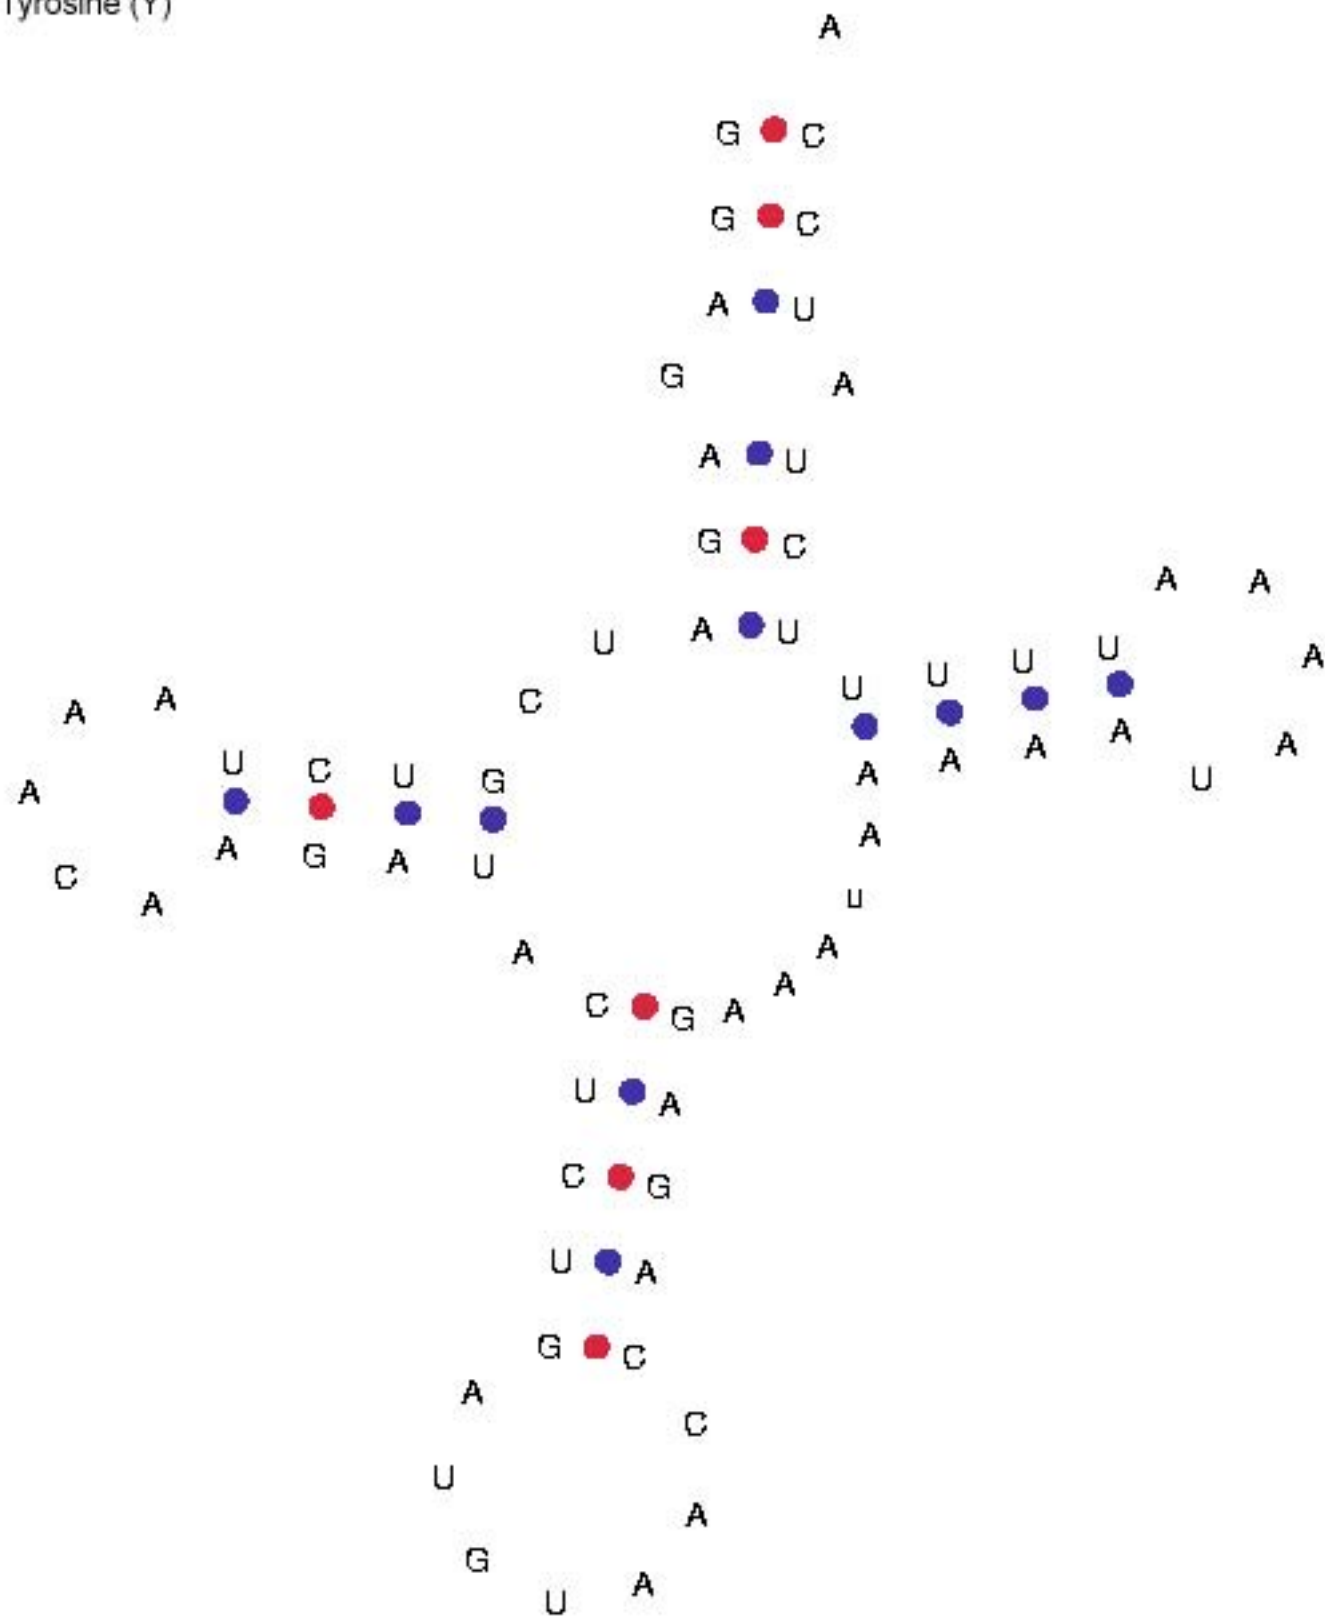

Valine (V)

A

C ● G

C ● G

A ● U

A ● U

A ● U

A ● U

A ● U

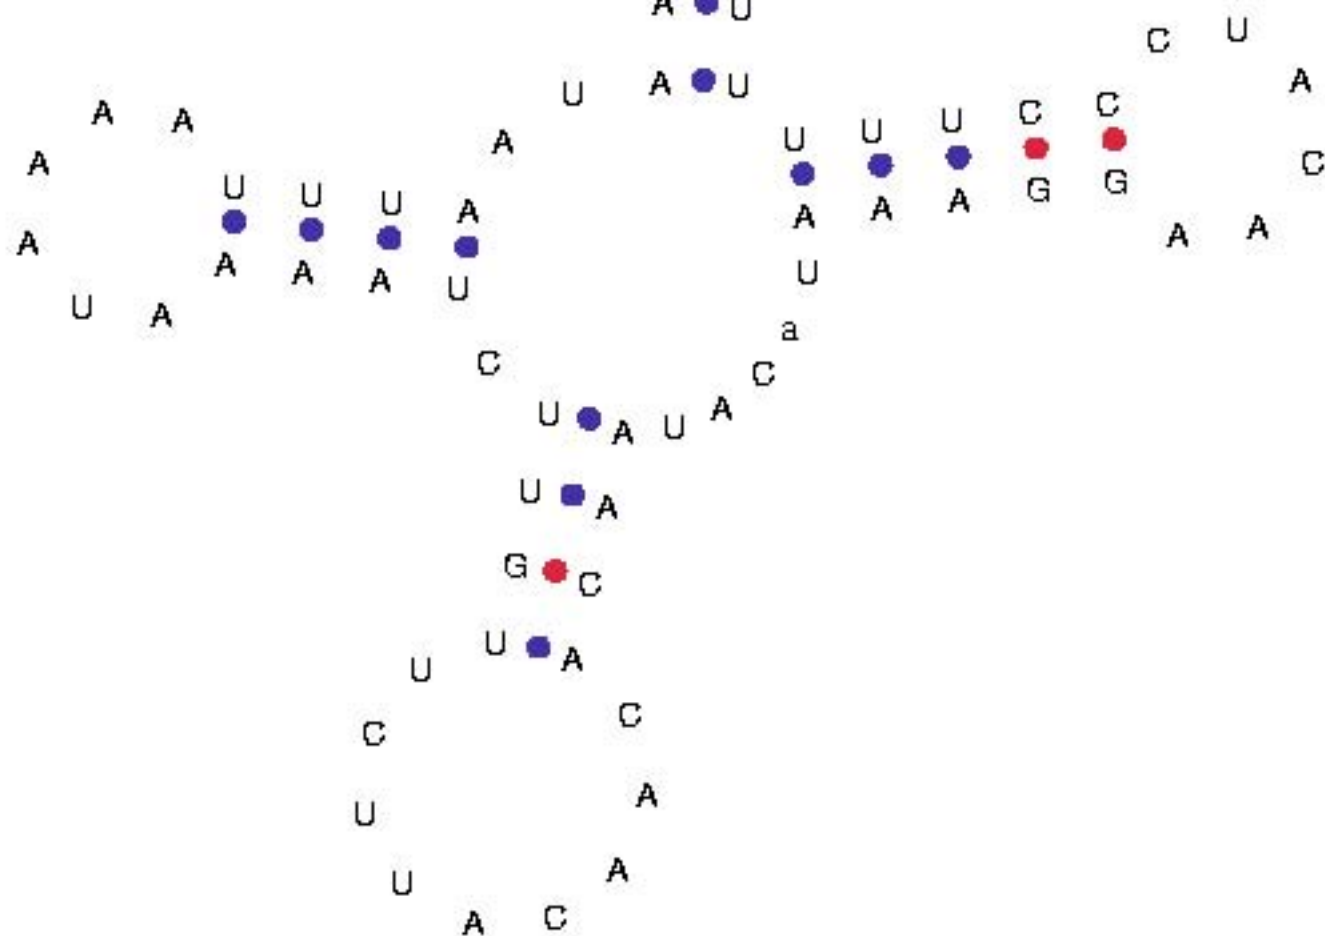

Supplement: 1471-2164-9-33-S1.pdf [file 1471-2164-9-33-S1.pdf]
